# Supplementary material for: Non-stoichiometry induced by differential oxygen/lone pair occupation in chiral bicyclic 1,1′-binaphthoxy cyclodiphosphazanes
Source: Royal Society of Chemistry journal article supplement (doi:10.1039/b509327a), 2005-01-01
Supplement: b509327a.pdf [file b509327a.pdf]

Supplementary Material for Chemical Communications  
This journal is © The Royal Society of Chemistry 2005

## **Supplementary data**

**Non-stoichiometry induced by differential oxygen/ lone pair  
occupation in chiral bicyclic 1,1'-binaphthoxy  
cyclodiphosphazanes**

**Manab Chakravarty, Praveen Kommana and K. C. Kumara Swamy\***

## Supplementary information

**Title:** Nonstoichiometry induced by differential oxygen/ lone pair occupation in chiral bicyclic 1,1'-binaphthoxy cyclodiphosphazanes

**Authors:** Manab Chakravarty, Praveen Kommana and K. C. Kumara Swamy\*

|   |                                                                       |              |
|---|-----------------------------------------------------------------------|--------------|
| 1 | Experimental procedures and crystal data for <b>5-9</b>               | <b>S1-S3</b> |
| 2 | Fig. S1. The $^{13}\text{C}$ NMR spectrum of compound <b>5</b> .      | <b>S4</b>    |
| 3 | Fig. S2. The $^{13}\text{C}$ NMR spectrum of compound <b>6</b> .      | <b>S5</b>    |
| 3 | Fig. S3. The $^{13}\text{C}$ NMR spectrum of compound <b>7</b> .      | <b>S6</b>    |
| 4 | ORTEP and packing diagrams for <b>5</b> with selected bond parameters | <b>S7</b>    |
| 5 | ORTEP and packing diagrams for <b>6</b> with selected bond parameters | <b>S8</b>    |
| 6 | ORTEP and packing diagrams for <b>8</b> with selected bond parameters | <b>S9</b>    |
| 7 | ORTEP and packing diagrams for <b>9</b> with selected bond parameters | <b>S10</b>   |

### Experimental details and crystal data for **5-9**

NMR spectra were recorded using either a Bruker 200 or a Bruker 400 MHz spectrometer.

**Compounds 5 and 9:** To **1a** (1.05 g, 3.82 mmol) in toluene (5 mL) was added a mixture of 1,1'-bi-2-naphthol (racemic or *S*(-)) (1.09 g, 3.82 mmol) and  $\text{Et}_3\text{N}$  (0.77 g, 7.63 mmol) in toluene (10 mL) drop-wise and the mixture was refluxed overnight. Filtration, followed by concentration of the solution (*ca* 5 mL) resulted in the crystallization of **5** or **9**. Data for compound **5** is given here. Yield: 1.51 g (81%). Mp: 172-174 °C [Found: C, 68.79; H, 6.16; N, 5.76. Calc. for  $\text{C}_{28}\text{H}_{30}\text{N}_2\text{O}_2\text{P}_2$ : C, 68.84; H, 6.19; N, 5.73]. IR (KBr):  $\bar{\nu} = 2959, 1593, 1504, 1323, 1204, 1144, 1010, 951 \text{ cm}^{-1}$ .  $^1\text{H}$  NMR ( $\text{CDCl}_3$ ):  $\delta$  0.94 (s, 18 H, *t*-Bu-*H*), 6.65 (d, 2 H), 6.69 (t, 2H) and 7.40 (t, 2H), 7.62 (d, 2H), 7.88 (d, 2H) and 8.06 (d, 2H) (all Ar-*H*).  $^{13}\text{C}$  NMR ( $\text{CDCl}_3$ ):  $\delta$  30.6 (br,  $\text{C}(\text{CH}_3)_3$ ), 52.3 (br, t,  $J \sim 10.3 \text{ Hz}$ ,

$C(CH_3)_3$ ), 124.4, 125.0, 126.0, 126.4, 127.4, 128.7, 130.4, 134.6, 151.4.  $^{31}P$  NMR:  $\delta$  171.4.  $[\alpha]_D^{27} = (+) 155$  ( $c = 0.23$ ,  $CHCl_3$ ). The racemic compound **9** (mp 168-170°C) initially was pure but partial oxidation had occurred in the process of crystallization. Although the original sample was pure [CHN analysis;  $^{31}P$  NMR], for the crystals there were additional low intensity *t*-Bu-*H* signals at  $\delta$  1.01, 1.04, 1.06 and 1.15.

**Compound 6:** To a solution of **2** (0.50 g, 1.02 mmol) in dry tetrahydrofuran (5 mL), diisopropyl azodicarboxylate (DIAD) (0.207 g, 1.02 mmol) was added. The yellow solution was stirred overnight at 25°C upon which it became colourless. Removal of the solvent followed by column chromatography (ethyl acetate/ hexane) afforded a solid that was crystallized from dichloromethane-hexane mixture (5:2, 7 mL). Yield: 0.35 g (68 %). Mp: 240 – 242 °C. IR (KBr):  $\bar{\nu} = 2963, 1287$  (s), 1211, 1057, 963  $cm^{-1}$ .  $^1H$  NMR ( $CDCl_3$ ):  $\delta$  1.00 and 1.04 (2 s, 18 H, *t*-Bu-*H*), 6.50 -8.10 (m, 12 H, Ar-*H*).  $^{13}C$  NMR ( $CDCl_3$ ):  $\delta$  30.9 ( $C(CH_3)_3$ ), 54.5 ( $C(CH_3)_3$ ), 120.7, 123.5, 124.4, 125.0, 125.4, 125.9, 126.9, 127.6, 127.7, 129.6, 130.7, 131.0, 134.4, 134.8, 150.2.  $^{31}P$  NMR:  $\delta$  98.3 and 4.2 (d,  $^2J(P-P) = 12.8$  Hz).  $[\alpha]_D^{27} = (+) 174$  ( $c = 0.46$ ,  $CHCl_3$ ). A small peak (ca 5%) for bis-oxidized product [ $\delta -7.8$ ] also was observed [Fig. 2].

**Compound 7:** To a solution of *m*-CPBA (0.11 g, 0.64 mmol) in dichloromethane (5 mL) was added a solution of **2** (0.13 g, 0.26 mmol) in dichloromethane (5 mL). The solution was stirred overnight at 25°C and was quenched by water. The reaction mixture was washed with  $NaHCO_3$  solution (10 mL) for three times to remove the remaining acid, extracted by dichloromethane and finally purified by column chromatography (ethyl acetate/ hexane) and crystallized from dichloromethane-hexane (1:1). Yield: 0.10 g (72 %). Mp: 260°C (charring). IR:  $\bar{\nu} = 2973, 1289$  (s), 1208, 1074, 976  $cm^{-1}$ .  $^1H$  NMR ( $CDCl_3$ ):  $\delta$  1.03 (s, 18 H, *t*-Bu-*H*), 6.55 (d, 2 H), 7.10 (t, 2H) and 7.40 (t, 2H), 7.60 (d, 2H), 7.90 (d, 2H) and 8.05 (d, 2H) (all Ar-*H*).  $^{13}C$  NMR ( $CDCl_3$ ):  $\delta$  30.4 ( $C(CH_3)_3$ ), 57.7 ( $C(CH_3)_3$ ), 123.1, 124.0, 125.9, 126.0, 127.5, 128.0, 130.6, 131.3, 134.8, 149.6. The triplet at  $\delta$  57.7 is not resolved.  $^{31}P$  NMR:  $\delta -7.8$ .  $[\alpha]_D^{27} = (+) 176$  ( $c = 0.23$ ,  $CHCl_3$ ).

**Mixed crystal 8:** This was obtained by first dissolving a 1:1 mixture (total 0.45 g) of **2** and **3** in toluene (5 mL); for complete dissolution  $CH_2Cl_2$  (1 mL) was added and subsequently removed. Mp: > 300 °C, but at 240 °C, colour changed to yellow. The  $^1H$

NMR spectrum showed a mixture of **5** and **7**, and was complex as expected.  $^{31}\text{P}$  NMR:  $\delta$  171.5 and  $-7.8$  (2 s, 2:5) [Fig. 2].

The CD spectra of **5-7** were essentially identical (this is to be expected since all of these are derived from the same chiral binaphthol).

*Crystal data:*

**5**:  $\text{C}_{28}\text{H}_{30}\text{N}_2\text{O}_2\text{P}_2$ ,  $M = 488.48$ , orthorhombic, space group  $P2_12_12_1$ ,  $a = 9.661(3)$ ,  $b = 15.095(2)$ ,  $c = 17.904(4)$ ,  $V = 2610.8(10) \text{ \AA}^3$ ,  $Z = 4$ ,  $\mu = 0.194 \text{ mm}^{-1}$ , data/restraints/parameters: 2604/0/313. Flack parameter:  $-0.19(19)$ . R indices ( $I > 2\sigma(I)$ ):  $R1 = 0.0444$ ,  $wR2$  (all data) =  $0.1149$ .

**6**:  $\text{C}_{28}\text{H}_{30}\text{N}_2\text{O}_{3.1}\text{P}_2$ ,  $M = 506.08$ , orthorhombic, space group  $P2_12_12_1$ ,  $a = 9.7123(6)$ ,  $b = 15.1885(9)$ ,  $c = 17.8209(10)$ ,  $V = 2628.9(3) \text{ \AA}^3$ ,  $Z = 4$ ,  $\mu = 0.197 \text{ mm}^{-1}$ , data/restraints/parameters: 4635/0/ 331. Flack parameter:  $-0.04(6)$ . R indices ( $I > 2\sigma(I)$ ):  $R1 = 0.0309$ ,  $wR2$  (all data) =  $0.0841$ .

**7**:  $\text{C}_{28}\text{H}_{30}\text{N}_2\text{O}_4\text{P}_2$ ,  $M = 520.48$ , orthorhombic, space group  $P2_12_12_1$ ,  $a = 9.7305(14)$ ,  $b = 15.256(2)$ ,  $c = 17.737(3)$ ,  $V = 2633.0(7) \text{ \AA}^3$ ,  $Z = 4$ ,  $\mu = 0.202 \text{ mm}^{-1}$ , data/restraints/parameters: 4638/0/ 331. Flack parameter:  $-0.05(7)$ . R indices ( $I > 2\sigma(I)$ ):  $R1 = 0.0329$ ,  $wR2$  (all data) =  $0.0913$  [The molecular structure is shown in the main text as Figure 1. Selected bond parameters: P(1) – N(1)  $1.6623(16)$ , P(1) – N(2)  $1.6796(17)$ , P(1) – O(1)  $1.6055(13)$ , P(1) – O(3)  $1.4526(14)$ , P(2) – N(1)  $1.6804(16)$ , P(2) – N(2)  $1.6714(17)$ , P(2) – O(2)  $1.5943(14)$ , P(2) – O(4)  $1.4560(15) \text{ \AA}$ . N(1) – P(1) – N(2)  $86.48(8)$ , N(1) – P(2) – N(2)  $86.17(8)$ , P(1) – N(1) – P(2)  $93.67(8)$ , P(1) – N(2) – P(2)  $93.37(8)^\circ$ ].

**8**:  $\text{C}_{28}\text{H}_{30}\text{N}_2\text{O}_{3.4}\text{P}_2$ ,  $M = 510.88$ , orthorhombic, space group  $P2_12_12_1$ ,  $a = 9.7160(8)$ ,  $b = 15.1905(12)$ ,  $c = 17.8076(14)$ ,  $V = 2628.2(4) \text{ \AA}^3$ ,  $Z = 4$ ,  $\mu = 0.200 \text{ mm}^{-1}$ , data/restraints/parameters: 4512/0/ 331. Flack parameter:  $0.05(10)$ . R indices ( $I > 2\sigma(I)$ ):  $R1 = 0.0471$ ,  $wR2$  (all data) =  $0.1034$ .

**9**:  $\text{C}_{56}\text{H}_{60}\text{N}_4\text{O}_{4.34}\text{P}_4$ ,  $M = 982.40$ , monoclinic, space group  $P2_1/c$ ,  $a = 22.838(3)$ ,  $b = 9.590(3)$ ,  $c = 23.901(5)$ ,  $\beta = 106.344(14)$ ,  $V = 5023(2) \text{ \AA}^3$ ,  $Z = 4$ ,  $\mu = 0.202 \text{ mm}^{-1}$ , data/restraints/parameters: 9828/0/ 644. R indices ( $I > 2\sigma(I)$ ):  $R1 = 0.0518$ ,  $wR2$  (all data) =  $0.1831$ .

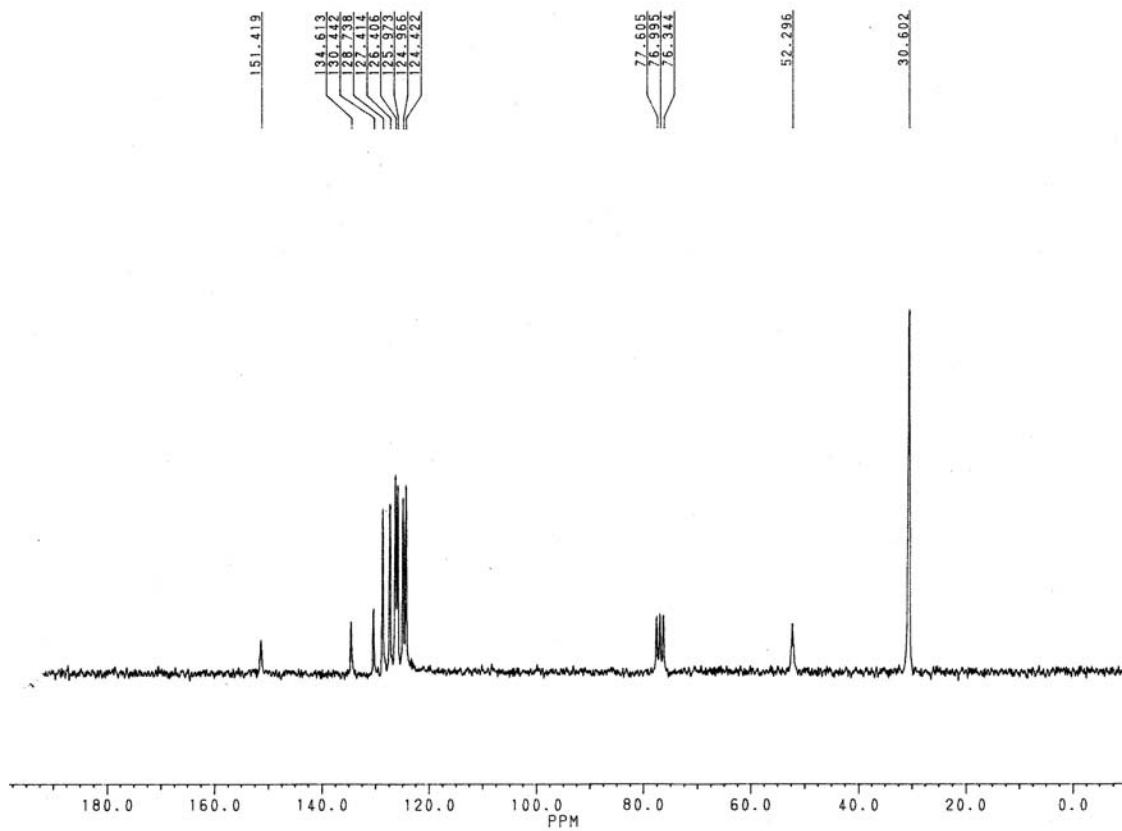

**Fig. S1.** The  $^{13}\text{C}$  NMR spectrum of compound 5.

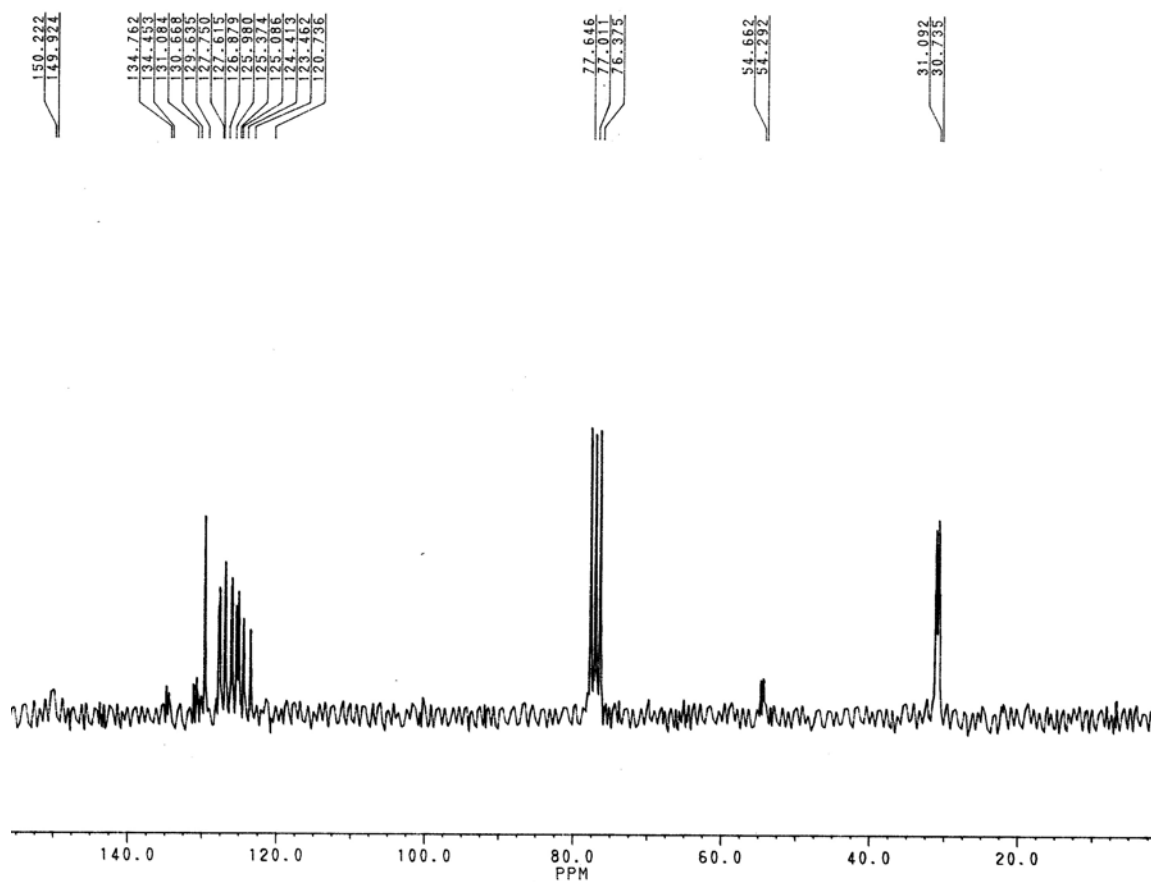

**Fig. S2.** The  $^{13}\text{C}$  NMR spectrum of compound **6**; the multiplet patterns at  $\delta \sim 150$ ,  $\sim 54$  and  $\sim 30$  are not well-resolved; other expected peaks are merged with the major peaks.

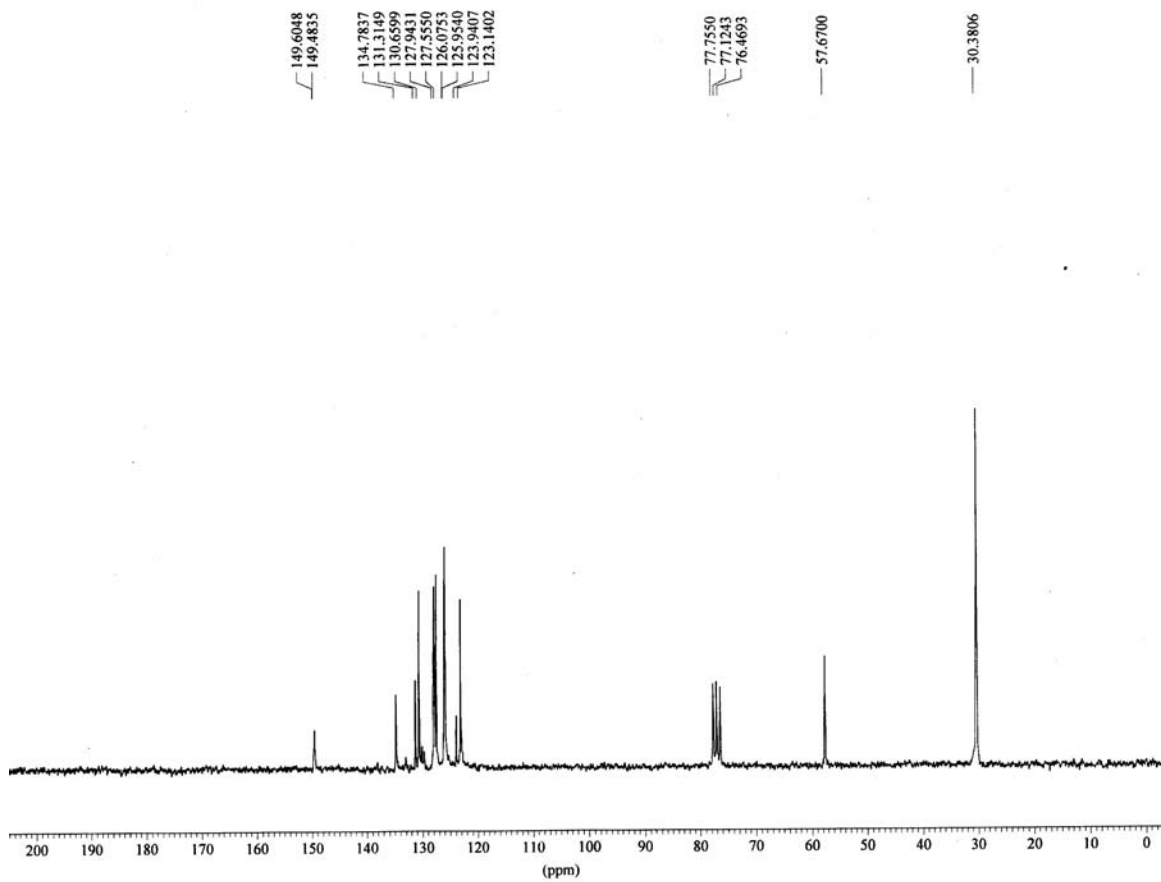

**Fig. S3** The  $^{13}\text{C}$  NMR spectrum of compound 7.

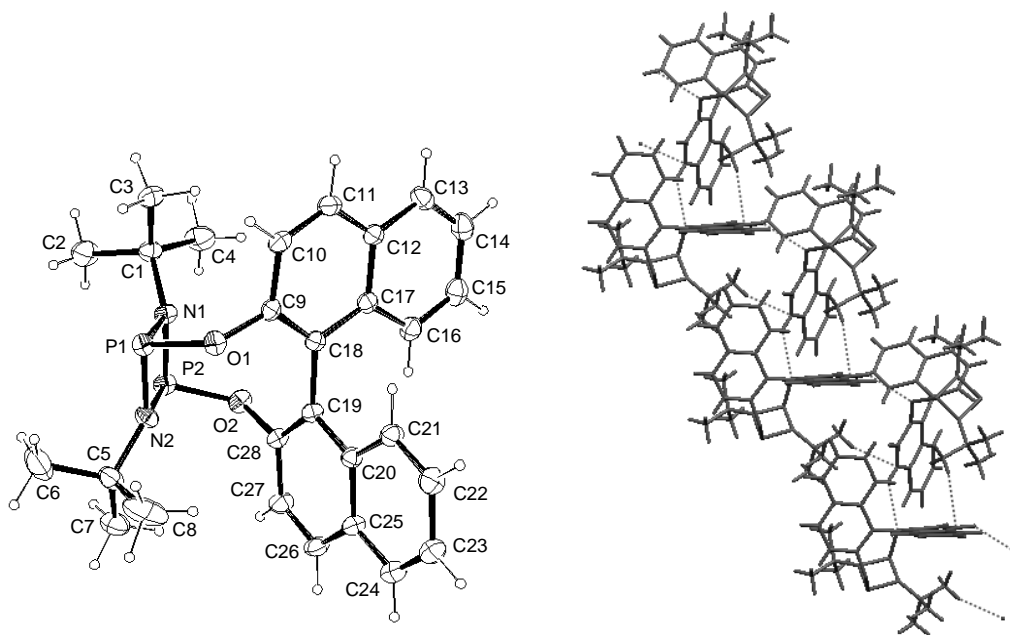

**Fig. S4** Molecular structure of **5**; only non-hydrogen atoms are labeled. On the right hand side is shown the packing diagram. Selected bond parameters: P(1) – N(1) 1.687(4), P(1) – N(2) 1.707(4), P(1) – O(1) 1.670(3), P(2) – N(1) 1.715(4), P(2) – N(2) 1.697(4), P(2) – O(2) 1.657(3) Å. N(1) – P(1) – N(2) 82.54(19), N(1) – P(2) – N(2) 81.99(18), P(1) – N(1) – P(2) 97.72(19), P(1) – N(2) – P(2) 97.6(2)<sup>o</sup>.



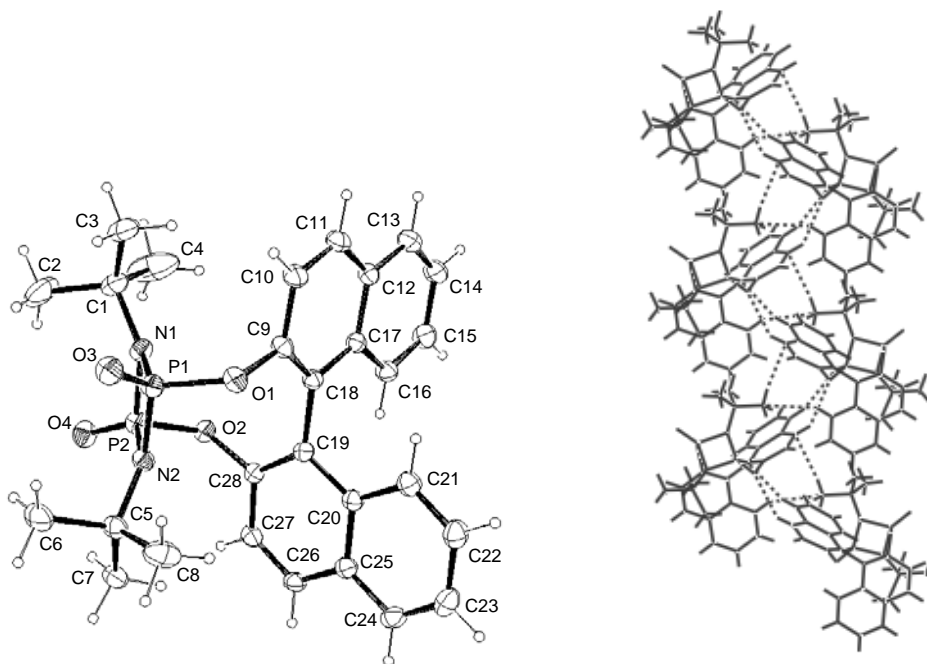

**Fig. S5.** Molecular structure of **6**; only non-hydrogen atoms are labeled. On the right hand side is shown the packing diagram. Selected bond parameters: P(1) – N(1) 1.6770(14), P(1) – N(2) 1.6908(15), P(1) – O(1) 1.6327(12), P(1) – O(3) 1.388(2), P(2) – N(1) 1.6989(14), P(2) – N(2) 1.6891(15), P(2) – O(2) 1.6281(13), P(2) – O(4) 1.397(3)Å. N(1) – P(1) – N(2) 85.05(7), N(1) – P(2) – N(2) 84.42(7), P(1) – N(1) – P(2) 95.29(7), P(1) – N(2) – P(2) 95.14(8)°.

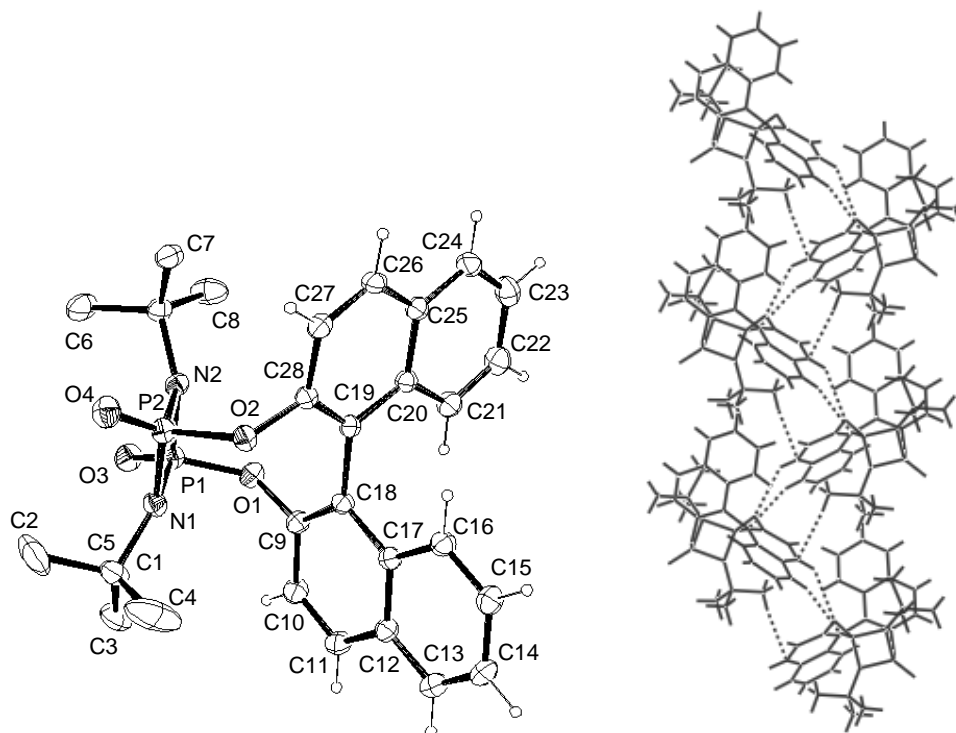

**Fig. S6.** Molecular structure of **8**; only non-hydrogen atoms are labeled. On the right hand side is shown the packing diagram. Selected bond parameters: P(1) – N(1) 1.675(2), P(1) – N(2) 1.683(3), P(1) – O(1) 1.622(2), P(1) – O(3) 1.426(3), P(2) – N(1) 1.686(3), P(2) – N(2) 1.680(3), P(2) – O(2) 1.617(2), P(2) – O(4) 1.413(3) Å. N(1) – P(1) – N(2) 85.19(13), N(1) – P(2) – N(2) 84.93(12), P(1) – N(1) – P(2) 94.94(13), P(1) – N(2) – P(2) 94.86(14)°.

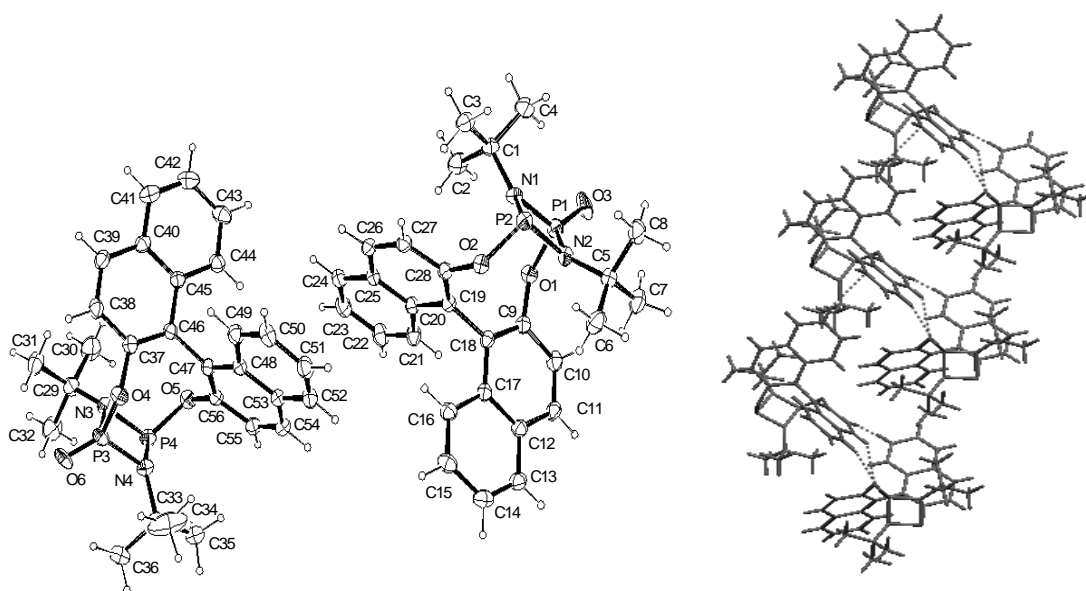

**Fig. S7.** Molecular structure of **9**. Two molecules are there in the asymmetric unit; only non-hydrogen atoms are labeled. On the right hand side is shown the packing diagram. Selected bond parameters: P(1) – N(1) 1.675(3), P(1) – N(2) 1.676(3), P(1) – O(1) 1.640(3), P(1) – O(3) 1.327(13), P(2) – N(1) 1.678(3), P(2) – N(2) 1.698(3), P(2) – O(2) 1.641(3), P(3) – O(6) 1.328(14), P(3) – N(3) 1.672(3), P(3) – N(4) 1.683(3), P(3) – O(4) 1.636(3), P(4) – N(3) 1.696(3), P(4) – N(4) 1.681(3), P(4) – O(5) 1.635(3) Å. N(1) – P(1) N(2) 82.73(13), N(1) – P(2) – N(2) 81.99(13), N(3) – P(3) – N(4) 83.49(14), N(3) – P(4) N(4) 82.82(14), P(1) – N(1) – P(2) 98.01(14), P(1) – N(2) – P(2) 97.22(14), P(3) – N(3) – P(4) 96.73(14), P(3) – N(4) – P(4) 96.91(15)°.
